# Supplementary material
Source: PubMed Central journal article supplement (PMC1955105)
Supplement: annrheumd_ard.2006.068858_1.pdf [file annrheumd_ard.2006.068858_1.pdf]

Summary of primers used in IL-4/IFN-gamma SNP myositis study

|                               | Forward primer sequence           | Reverse primer sequence            | Reporter 1 Sequence     | Reporter 2 Sequence   | Design Strand |
|-------------------------------|-----------------------------------|------------------------------------|-------------------------|-----------------------|---------------|
| <b>rs1861494</b>              | AGTGAAGAGGAAGTAGGTGAGGAA          | CAAGGGACAATGAGAGAACTGCTT           | TCAGTACTCCCCGCTTC       | TCAGTACTCCCTGCTTC     | Reverse       |
| <b>rs1861493</b>              | CCACCAAGGAAGTGTGATGAATCA          | GTTTTGGAGCAAAGAAGGTCATCAA          | CTTATACAGTGAGCCTAAC     | CTTATACAGTGAACCTAAC   | Reverse       |
| <b>rs734244*</b>              | AGCCTGGCCACCTAACAG                | CCCAGCAGGATGGTTCCA                 | AGCAAGCTAAGGAGCT        | CAAGCTGAGGAGCT        | Reverse       |
| <b>rs2227282</b>              | CGGCAGGGATGGAGTGT                 | CAGCTTTAGTGCAAGGCCTTAAC            | CAGAGCAACTAAAAC         | CAGAGCAAGTAAAAC       | Reverse       |
| <b>rs2243266</b>              | GTGCCTCAGTCTGGGTCTAG              | AATCTTTGTGTTTCATCTCTTATTTATGTAGGCT | CAGTTCATATTTAACGTTTTT   | CAGTTCATATTTAATGTTTTT | Reverse       |
| <b>rs734244</b>               |                                   |                                    |                         |                       |               |
| <b>(SNaPshot 3100)</b>        | CTAACAGCCCTCTGGGTTCGG             | AGCAGGATGGTTCAGACCGAG              | GTTCCGGCCGGCCAGAGCAAGCT |                       |               |
| <b>rs2069733</b>              |                                   |                                    |                         |                       |               |
| <b>(sizing reaction 3100)</b> | VIC -<br>CCCAGCCATCCTCAGAAATGTGGT | CCCTGCCTTCTAGGCAAGCAAATTG          |                         |                       |               |
| <b>Microsatellite marker</b>  |                                   |                                    |                         |                       |               |
| <b>(microsatellite 3100)</b>  | HEX - AAAAGATAGTTCAAAC            | TTATAATTATAGCTGTC                  |                         |                       |               |

| Assays on Demand | Assay ID       | Context Sequence                                         | Design Strand |
|------------------|----------------|----------------------------------------------------------|---------------|
| <b>rs2070874</b> | C__16176215_10 | TTAGCTTCTCCTGATAAACTAATTG[C/T]CTCACATTGTCACTGCAAATCGACA  | Reverse       |
| <b>rs2227284</b> | C__11818513_1  | TCTTGGGTGGACAAGTAGTTGGAGC[G/T]ATTTCCCTATTTACCAAAGAGAGCTA | Forward       |
| <b>rs2243267</b> | C__2549868_1   | TACTCACTGCCGCTTATTTACAGAA[C/G]CAAAAATCTGCCACGATAGGGGCCT  | Forward       |
| <b>rs2069718</b> | C__15799728_10 | GGGCCATTTAGATGATGCTTCATAA[A/G]ATGTGGACCATTTACCTCCTCTTG   | Forward       |

\*The initial assays by design for rs734244 failed and was repeated using SNaPshot
